# Supplementary material
Source: PubMed Central journal article supplement (PMC2761010)
Supplement: NIHMS127184-supplement-1.pdf [file NIHMS127184-supplement-1.pdf]

## **Detailed Computational Modeling Methods**

Two Markov models, one representing hERG 1a/1b and another representing hERG 1a, were constructed using a previous model for  $I_{Kr}$  as a template<sup>1</sup>. Simulations for model validation reproduced the experimental protocols, including temperature (exception: the E-4031 dose response curve was measured at room temperature, but was simulated without adjusting the models which were validated at near-physiological temperature). Matlab and the ode23s integrator (absolute and relative error tolerance set to  $10^{-6}$ ) were used to compute these simulations using a Windows XP desktop computer with a Pentium 4 processor. Parameters were chosen using the interior-reflective Newton method<sup>2</sup> and a least squares objective function to match action potential clamp data for hERG 1a/1b. This was followed by manual refinements to improve correspondence of the models with all of the other data for hERG 1a/1b and to determine the hERG 1a parameters. Equations for the hERG models are given in this online supplement. The hERG models were incorporated into the Fink modified<sup>3</sup> ten Tusscher action potential model<sup>4</sup> in exchange for the native  $I_{Kr}$ . Action potential simulations were computed using Rush and Larson integration<sup>5</sup> for the cell model (fixed time step = 0.01 ms) and the CVODE<sup>6</sup> integrator for the hERG models (several time steps per 0.01 ms). They were implemented in C++ and run on Linux cluster nodes. All action potential results show the 1000<sup>th</sup> beat at 1 Hz pacing.

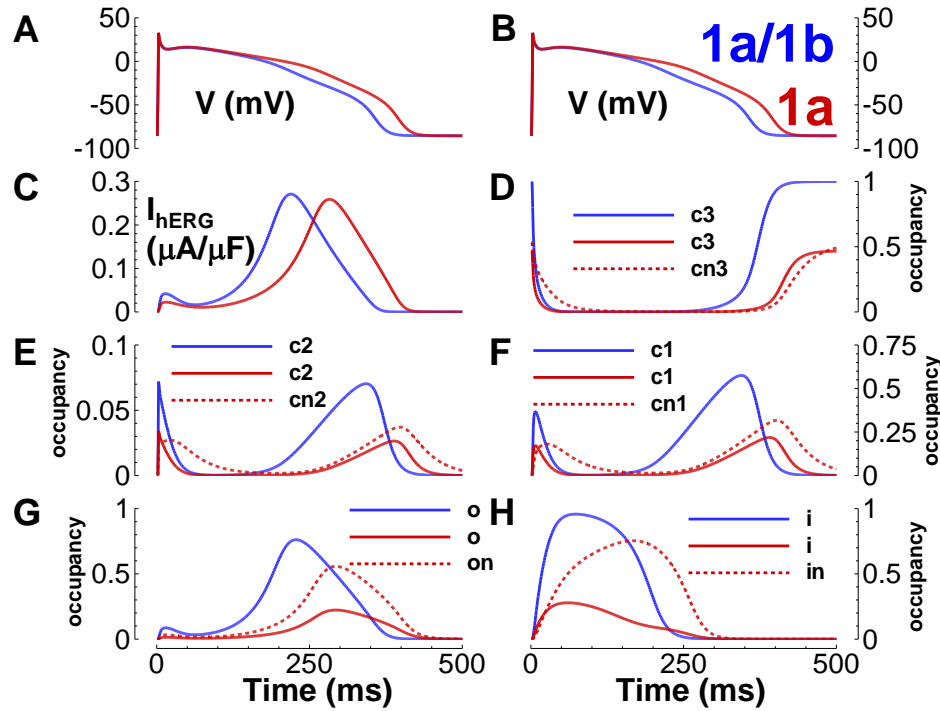

**Online Figure I.** Comparison of hERG 1a/1b (blue) and hERG 1a (red) in the action

potential without E-4031. Shown are results from the 1000<sup>th</sup> paced beat at 1 Hz for the Fink modified<sup>3</sup> ten Tusscher action potential model<sup>4</sup>. A&B) Action potentials. C) hERG 1a/1b (blue) hERG 1a/1b (blue) and hERG 1a (solid red for normal mode, and dashed red for N-mode). E-4031-blocked state occupancies are zero for hERG 1a/1b and for hERG 1a (not shown) since the drug is not applied in this simulation. APD<sub>90</sub> (measure of the time elapsed between activation and 90% repolarization) for hERG 1a is 376 ms. This is 38 ms longer than APD<sub>90</sub> for hERG 1a/1b. The hERG 1a versus hERG 1a/1b prolongation is 30 ms when our models are incorporated into the Priebe and Beuckelmann action potential model<sup>7</sup> (not shown). Prolongation occurs because N-mode occupancy results in slower activation, and slower closed-state inactivation. N-mode activation is movement from *cn3*, to *cn2*, to *cn1*. This movement is slow compared with *c3*, to *c2*, to *c1* movement in the normal mode because N-mode

activation/deactivation rates are reduced to 0.35 times the normal mode values. A comparison of early growth and decay for solid versus dashed red lines in panels D-F illustrates this. Closed-state inactivation in the N-mode, which is movement from  $cn1$  to  $in$ , is slower than the corresponding normal mode movement from  $c1$  to  $i$ . This is because the N-mode transition rate  $\alpha n2$  is reduced to 0.35 times the corresponding normal mode transition rate  $\alpha 2$ . Thus, recovery current through the open state arrives after a delay in N-mode compared to normal mode. Panels F and H illustrate. In panel F, early  $cn1$  decay is slower than  $c1$  decay. In panel H, decay from normal mode state  $i$  begins at  $t = 60$  ms while N-mode decay from state  $in$  does not begin until 108 ms later, when  $cn1$  finally finishes emptying into  $in$ .

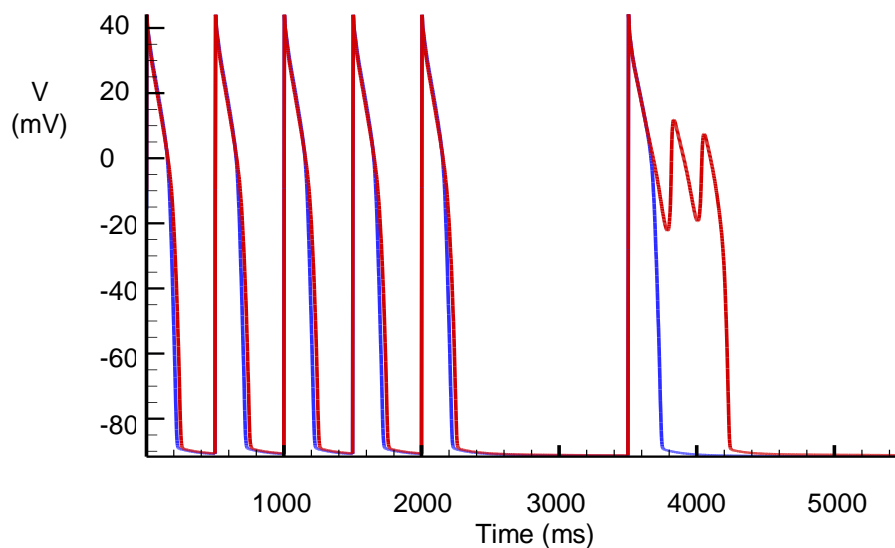

**Online Figure II.** *Pause-induced early afterdepolarizations for  $hERG 1a$  (red), but not for  $hERG 1a/1b$  (blue) in the presence of E-4031. To test for susceptibility to early afterdepolarizations we used the Luo-Rudy midmyocardial ventricular action potential model<sup>8</sup>. Unlike the human-based Fink modified ten Tusscher model and the Priebe and Beuckelmann*

model used elsewhere in this study, the guinea pig-based Luo-Rudy model has features that enable the reliable demonstration of early afterdepolarizations under appropriate conditions.<sup>9, 10</sup> This figure shows the Luo-Rudy model paced for 40 beats at a cycle length of 500 ms with hERG 1a or hERG 1a/1b in place of the native  $I_{Kr}$ . Following these 40 beats (of which the last five are shown), a 1500 ms pause preceded an additional single paced beat. [E-4031] was set to 55 nM, the minimum concentration needed to cause an early afterdepolarization. The formation of early afterdepolarizations for hERG 1a but not for hERG 1a/1b demonstrates a connection between the altered channel kinetics of hERG 1a and the clinical appearance of *torsades de pointes* arrhythmia in the presence of hERG blocking drugs following a pause<sup>11</sup>.

## Model Equations.

hERG 1a/1b model transition rates ( $\text{ms}^{-1}$ )

$$\alpha = 0.03552 * \exp\left[1.812 * \frac{VF}{RT}\right]$$

$$\beta = 1.807e-3 * \exp\left[-1.913 * \frac{VF}{RT}\right]$$

$$\alpha_1 = 4.340$$

$$\beta_1 = 0.5409$$

$$\alpha_2 = 0.02620 * \exp\left[1.241 * \frac{VF}{RT}\right]$$

$$\beta_2 = 3.300e-3 * \exp\left[-0.9571 * \frac{VF}{RT}\right]$$

$$\alpha_i = 0.1139 * \exp\left[-0.4898 * \frac{VF}{RT}\right] * \frac{4.5}{[K^+]_o}$$

$$\beta_i = 0.1254 * \exp\left[0.3781 * \frac{VF}{RT}\right] * \left(\frac{4.5}{[K^+]_o}\right)^3$$

$$\mu = \frac{\alpha_i * \beta_2}{\beta_i}$$

$$ON = [E4031] * 2.0e3, \text{ with } [E-4031] \text{ in mol/L}$$

$$OFF = 5.0e-6$$

10 coupled ordinary differential equations

$$\frac{dc3}{dt} = c2 * \beta - c3 * \alpha$$

$$\frac{dc2}{dt} = c3 * \alpha + c1 * \beta_1 - c2 * (\beta + \alpha_1)$$

$$\frac{dc1}{dt} = c2 * \alpha_1 + o * \beta_2 + i * \mu - c1 * (\beta_1 + 2 * \alpha_2)$$

$$\frac{do}{dt} = c1 * \alpha_2 + i * \alpha_i + b * OFF - o * (\beta_2 + \beta_i + ON)$$

$$\frac{di}{dt} = c1 * \alpha_2 + o * \beta_i - i * (\mu + \alpha_i)$$

$$\frac{dcb3}{dt} = cb2 * \beta - cb3 * \alpha$$

$$\frac{dcb2}{dt} = cb3 * \alpha + cb1 * \beta1 - cb2 * (\beta + \alpha1)$$

$$\frac{dcb1}{dt} = cb2 * \alpha1 + b * \beta2 + ib * \mu - cb1 * (\beta1 + 2 * \alpha2)$$

$$\frac{db}{dt} = cb1 * \alpha2 + ib * \alpha i + o * ON - b * (\beta2 + \beta i + OFF)$$

$$\frac{dib}{dt} = cb1 * \alpha2 + b * \beta i - ib * (\mu + \alpha i)$$

### Initial Conditions

$$c3 = 1$$

$$c2 = c1 = o = i = cb3 = cb2 = cb1 = b = ib = 0$$

### Calculation of Current

$$\bar{G}_{hERG} = 0.0048 \text{ mS, Fink modified}^3, \text{ ten Tusscher}^4$$

$$\bar{G}_{hERG} = 0.015 \text{ mS, Priebe and Buekelmann}^7$$

$$\bar{G}_{hERG} = 0.02614 \text{ mS, Luo and Rudy}^8$$

$$E_K = \frac{RT}{F} \ln \left( \frac{[K^+]_o}{[K^+]_i} \right)$$

$$I_{hERG,1a/1b} = \bar{G}_{hERG} * \sqrt{[K^+]_o} / 5.4 * o * (V - E_K)$$

### hERG 1a model transition rates (ms<sup>-1</sup>)

$$\alpha = 0.03552 * \exp \left[ 1.812 * \frac{VF}{RT} \right]$$

$$\beta = 1.807e-3 * \exp \left[ -1.913 * \frac{VF}{RT} \right]$$

$$\alpha1 = 4.340$$

$$\beta1 = 0.5409$$

$$\alpha2 = 0.02620 * \exp \left[ 1.241 * \frac{VF}{RT} \right]$$

$$\beta2 = 3.300e-3 * \exp \left[ -0.9571 * \frac{VF}{RT} \right]$$

$$\alpha_i = 0.1139 * \exp \left[ -0.4898 * \frac{VF}{RT} \right] * \frac{4.5}{[K^+]_o}$$

$$\beta_i = 0.1254 * \exp \left[ 0.3781 * \frac{VF}{RT} \right] * \left( \frac{4.5}{[K^+]_o} \right)^3$$

$$\mu = \frac{\alpha_i * \beta_2}{\beta_i}$$

$$\alpha_n = 0.35 * \alpha$$

$$\beta_n = 0.35 * \beta$$

$$\alpha_{n1} = 0.35 * \alpha_1$$

$$\beta_{n1} = 0.35 * \beta_1$$

$$\alpha_{n2} = 0.35 * \alpha_2$$

$$\beta_{n2} = 0.35 * \beta_2$$

$$\alpha_{ni} = 0.4 * \alpha_i$$

$$\beta_{ni} = 1.2 * \beta_i$$

$$\mu_n = \frac{\alpha_{ni} * \beta_{n2}}{\beta_{ni}}$$

$$ON = [E4031] * 2.0e3, \text{ with } [E-4031] \text{ in mol/L}$$

$$OFF = 5.0e-6$$

$$\theta = 5.0$$

$$\rho = 2.0$$

$$\kappa = ON * \theta$$

$$\lambda = ON * \rho$$

$$\delta = OFF * \theta$$

$$\nu = OFF * \rho$$

20 coupled ordinary differential equations

$$\frac{dc3}{dt} = c2 * \beta - c3 * \alpha$$

$$\frac{dc2}{dt} = c3 * \alpha + c1 * \beta_1 - c2 * (\beta + \alpha_1)$$

$$\frac{dc1}{dt} = c2 * \alpha_1 + o * \beta_2 + i * \mu - c1 * (\beta_1 + 2 * \alpha_2)$$

$$\frac{do}{dt} = c1 * \alpha_2 + i * \alpha_i + on * \rho + b * OFF + nb * \nu - o * (\beta_2 + \beta_i + \theta + ON + \kappa)$$

$$\frac{di}{dt} = c1 * \alpha_2 + o * \beta_i - i * (\mu + \alpha_i)$$

$$\frac{dcn3}{dt} = cn2 * \beta_n - c3 * \alpha_n$$

$$\frac{dcn2}{dt} = cn3 * \alpha n + cn1 * \beta n1 - cn2 * (\beta n + \alpha n1)$$

$$\frac{dcn1}{dt} = cn2 * \alpha n1 + on * \beta n2 + in * \mu n - cn1 * (\beta n1 + 2 * \alpha n2)$$

$$\frac{don}{dt} = cn1 * \alpha n2 + in * \alpha ni + o * \theta + b * \delta + nb * OFF - on * (\beta n2 + \beta ni + \rho + \lambda + ON)$$

$$\frac{din}{dt} = cn1 * \alpha n2 + on * \beta ni - in * (\mu n + \alpha ni)$$

$$\frac{dcb3}{dt} = cb2 * \beta - cb3 * \alpha$$

$$\frac{dcb2}{dt} = cb3 * \alpha + cb1 * \beta1 - cb2 * (\beta + \alpha1)$$

$$\frac{dcb1}{dt} = cb2 * \alpha1 + b * \beta2 + ib * \mu - cb1 * (\beta1 + 2 * \alpha2)$$

$$\frac{db}{dt} = cb1 * \alpha2 + ib * \alpha i + o * ON + on * \lambda + nb * \rho - b * (\beta2 + \beta i + OFF + \delta + \theta)$$

$$\frac{dib}{dt} = cb1 * \alpha2 + b * \beta i - ib * (\mu + \alpha i)$$

$$\frac{dcnb3}{dt} = cnb2 * \beta n - cnb3 * \alpha n$$

$$\frac{dcnb2}{dt} = cnb3 * \alpha n + cnb1 * \beta n1 - cnb2 * (\beta n + \alpha n1)$$

$$\frac{dcnb1}{dt} = cnb2 * \alpha n1 + nb * \beta n2 + inb * \mu n - cnb1 * (\beta n1 + 2 * \alpha n2)$$

$$\frac{dnb}{dt} = cnb1 * \alpha n2 + inb * \alpha ni + o * \kappa + on * ON + b * \theta - nb * (\beta n2 + \beta ni + \nu + OFF + \rho)$$

$$\frac{dinb}{dt} = cnb1 * \alpha n2 + nb * \beta ni - inb * (\mu n + \alpha ni)$$

## Initial Conditions

$$c3 = \frac{\rho}{\rho + \theta} = 0.285714286$$

$$c2 = c1 = o = i = cb3 = cb2 = cb1 = b = ib = 0$$

$$cn3 = \frac{\theta}{\rho + \theta} = 0.714285714$$

$$cn2 = cn1 = on = in = cnb3 = cnb2 = cnb1 = nb = inb = 0$$

## Calculation of Current

$$\bar{G}_{HERG} = 0.0048 \text{ mS}, \text{ Fink modified}^3, \text{ ten Tusscher}^4$$



$$\bar{G}_{hERG} = 0.015 \text{ mS, Priebe and Buekelmann}^7$$

$$\bar{G}_{hERG} = 0.02614 \text{ mS, Luo and Rudy}^8$$

$$E_K = \frac{RT}{F} \ln\left(\frac{[K^+]_o}{[K^+]_i}\right)$$

$$I_{hERG,1a} = \bar{G}_{hERG} * \sqrt{[K^+]_o / 5.4} * (o + on) * (V - E_K)$$

1. Silva J, Rudy Y. Subunit interaction determines IKs participation in cardiac repolarization and repolarization reserve. *Circulation*. 2005;112:1384-1391.
2. Coleman TF, Li Y. *An Interior Trust Region Approach for Nonlinear Minimization Subject to Bounds*: Cornell University; 1993.
3. Fink M, Noble D, Virag L, et al. Contributions of HERG K<sup>+</sup> current to repolarization of the human ventricular action potential. *Prog Biophys Mol Biol*. 2008;96:357-376.
4. ten Tusscher KH, Panfilov AV. Alternans and spiral breakup in a human ventricular tissue model. *Am J Physiol Heart Circ Physiol*. 2006;291:H1088-1100.
5. Rush S, Larsen H. A practical algorithm for solving dynamic membrane equations. *IEEE Trans Biomed Eng*. 1978;25:389-392.
6. Cohen SD, Hindmarsh AC. CVODE, a stiff/nonstiff ODE solver in C. *Comput Phys*. 1996;10:138-143.
7. Priebe L, Beuckelmann DJ. Simulation study of cellular electric properties in heart failure. *Circ Res*. 1998;82:1206-1223.
8. Faber GM, Rudy Y. Action potential and contractility changes in [Na<sup>+</sup>]<sub>i</sub> overloaded cardiac myocytes: a simulation study. *Biophys J*. 2000;78:2392-2404.
9. Viswanathan PC, Rudy Y. Pause induced early afterdepolarizations in the long QT syndrome: a simulation study. *Cardiovasc Res*. 1999;42:530-542.
10. Zeng J, Rudy Y. Early afterdepolarizations in cardiac myocytes: mechanism and rate dependence. *Biophys J*. 1995;68:949-964.
11. Tan HL, Bardai A, Shimizu W, Moss AJ, Schulze-Bahr E, Noda T, Wilde AA. Genotype-specific onset of arrhythmias in congenital long-QT syndrome: possible therapy implications. *Circulation*. 2006;114:2096-2103.
